# Supplementary material for: First principles study of B7N5 as a high capacity electrode material for K-ion batteries
Source: Royal Society of Chemistry journal article supplement (doi:10.1039/d3cp02391e), 2023-01-01
Supplement: d3cp02391e1.pdf [file d3cp02391e1.pdf]

# **First principles study of B<sub>7</sub>N<sub>5</sub> as high capacity electrode material for K-ion batteries**

Yu Xiong,<sup>a</sup> Yuhang Wang,<sup>a</sup> Ninggui Ma,<sup>a</sup> Yaqin Zhang,<sup>a</sup> Shuang Luo<sup>a</sup> and Jun Fan<sup>a,b,\*</sup>

<sup>a</sup> *Department of Materials Science and Engineering, City University of Hong Kong, Hong Kong, China.*

<sup>b</sup> *Center for Advance Nuclear Safety and Sustainable Department, City University of Hong Kong, Hong Kong, China*

\*Corresponding author

*Email address:* junfan@cityu.edu.hk (Jun Fan)

**Fig. S1**

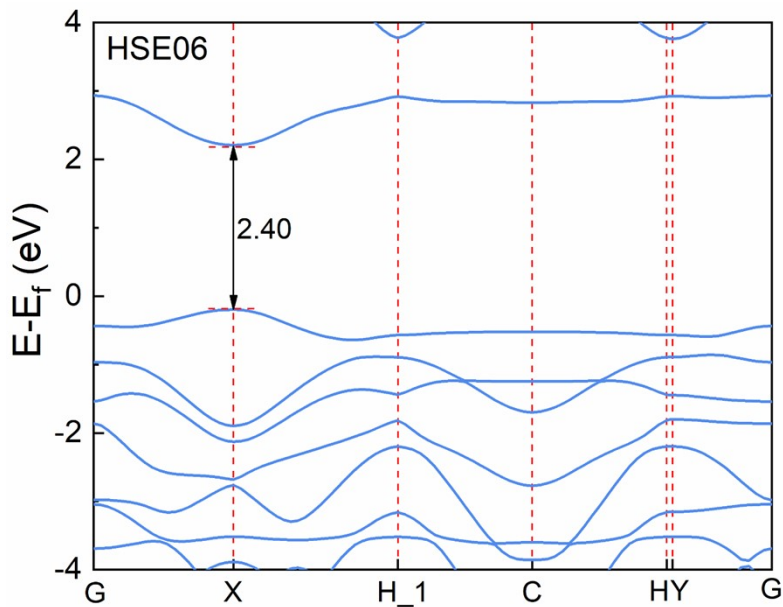

Fig. S1 The band structure of B<sub>7</sub>N<sub>5</sub> via HSE06 method.

Fig. S2

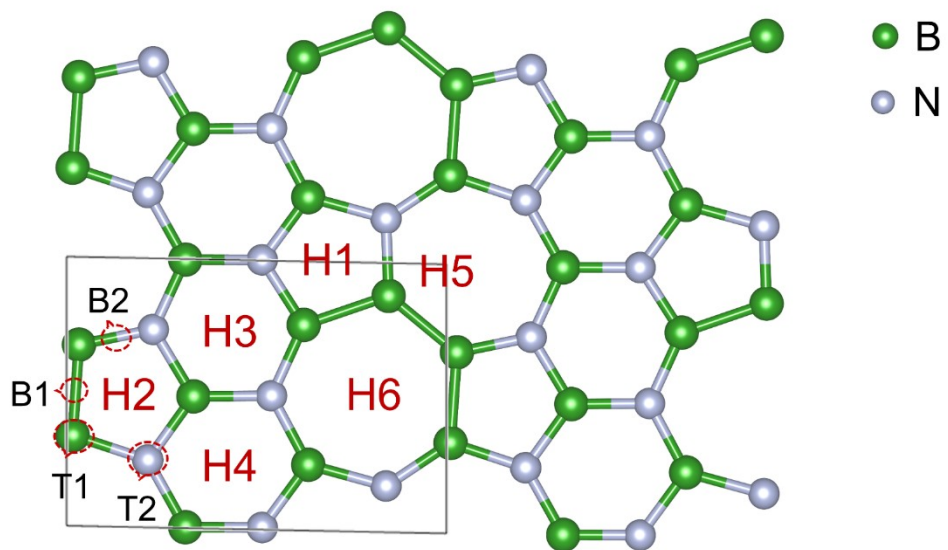

Fig. S2 The possible adsorption hollow, top and bridge sites for metal atom on B<sub>7</sub>N<sub>5</sub>.

Fig. S3

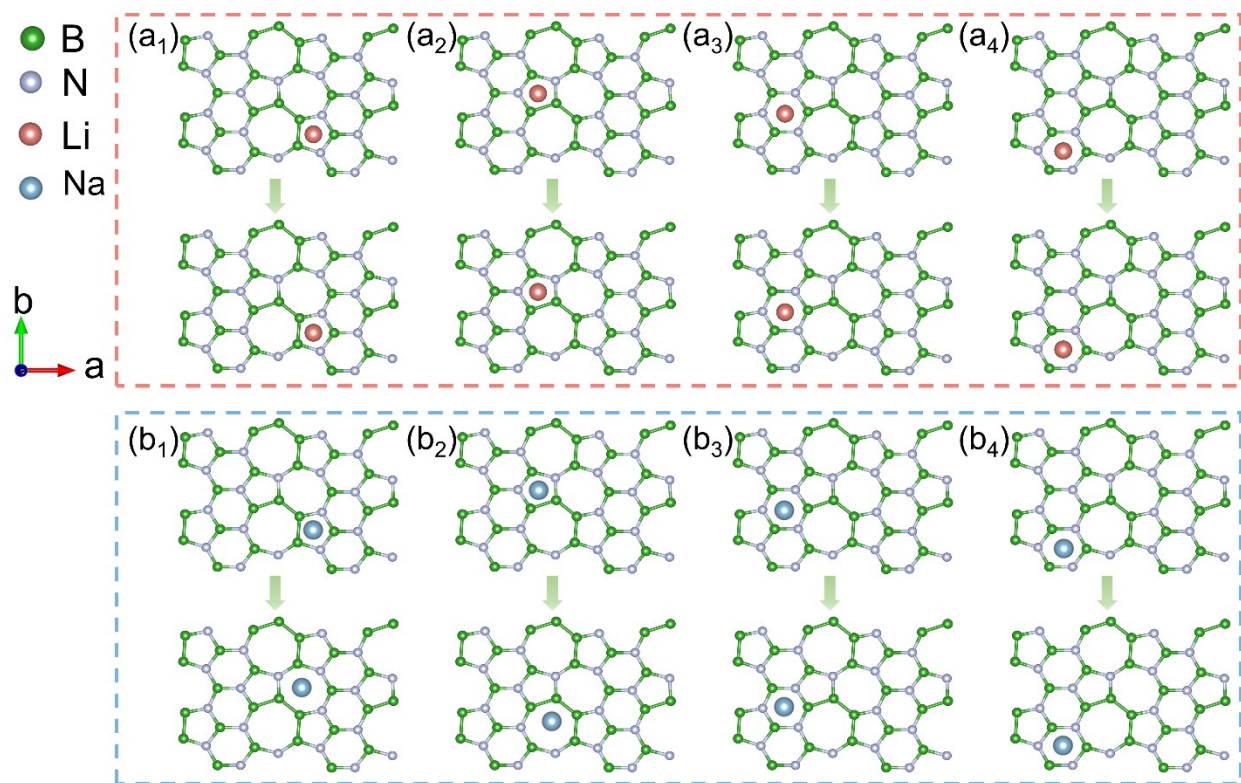

Fig. S3 The initial structures (first row) and optimized structures (second row) of a single (a) Li, (b) Na atom adsorbed of different hollow sites (H1, H2, H3 and H4) on  $B_7N_5$ .

**Fig. S4**

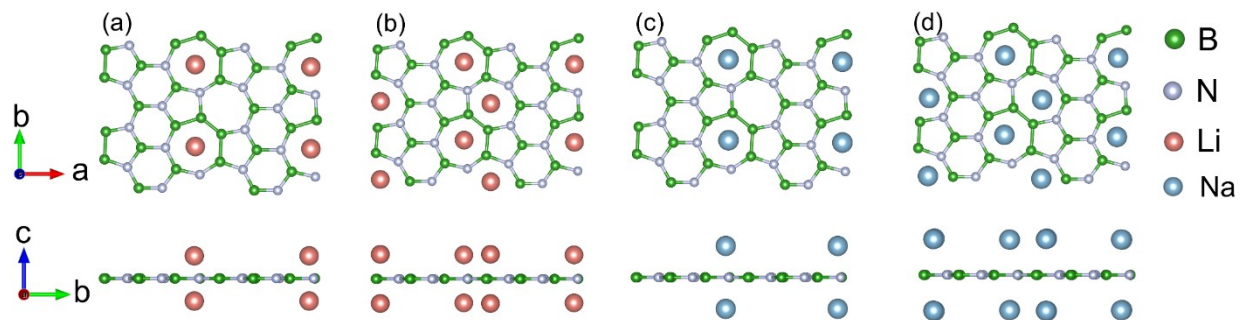

Fig. S4 The optimized structure of top view and side view of (a)  $B_7N_5Li_2$ , (b)  $B_7N_5Li_4$ , (c)  $B_7N_5Na_2$ , (d)  $B_7N_5Na_4$ .

Fig. S5

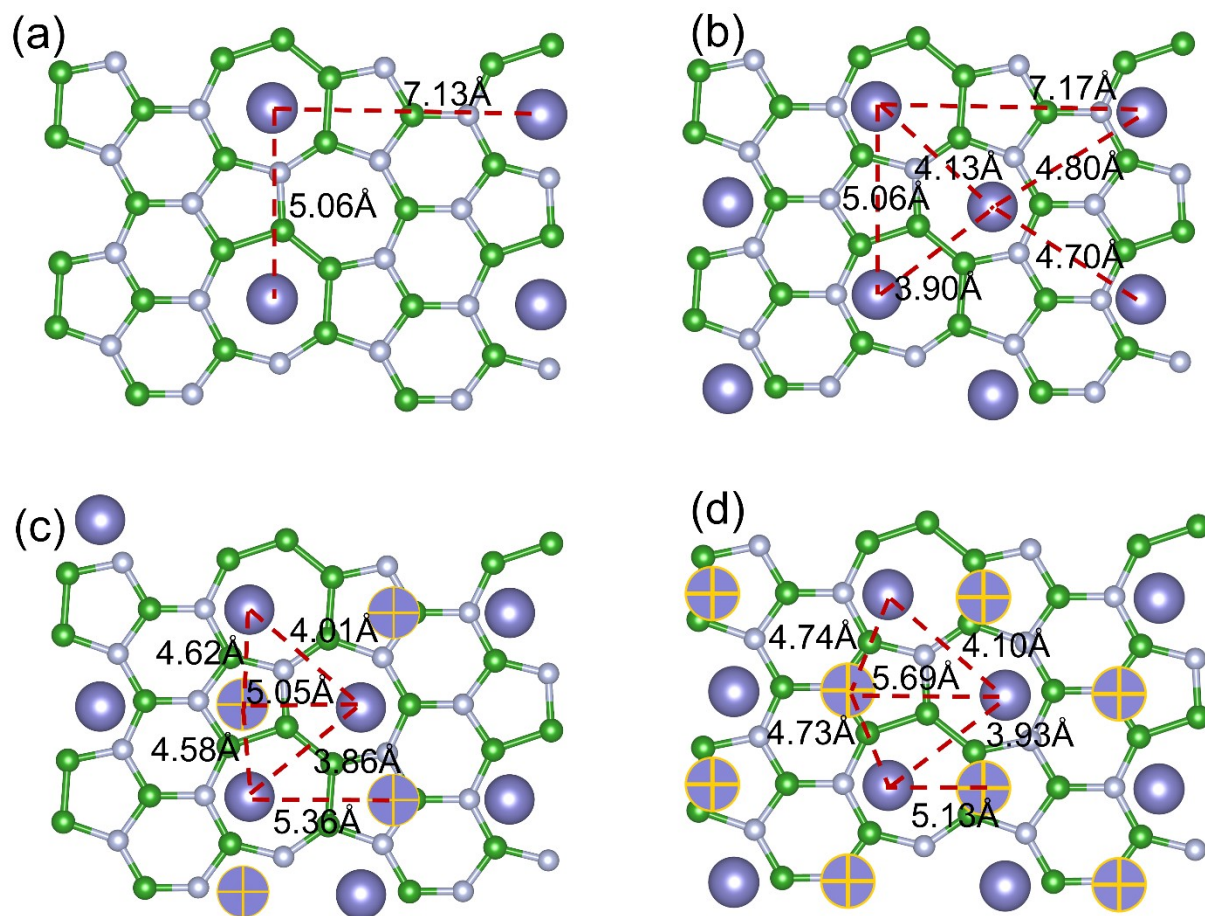

Fig. S5 The distances between K atoms for (a)  $B_7N_5K_2$ , (b)  $B_7N_5K_4$ , (c)  $B_7N_5K_6$  and (d)  $B_7N_5K_8$ .

**Fig. S6**

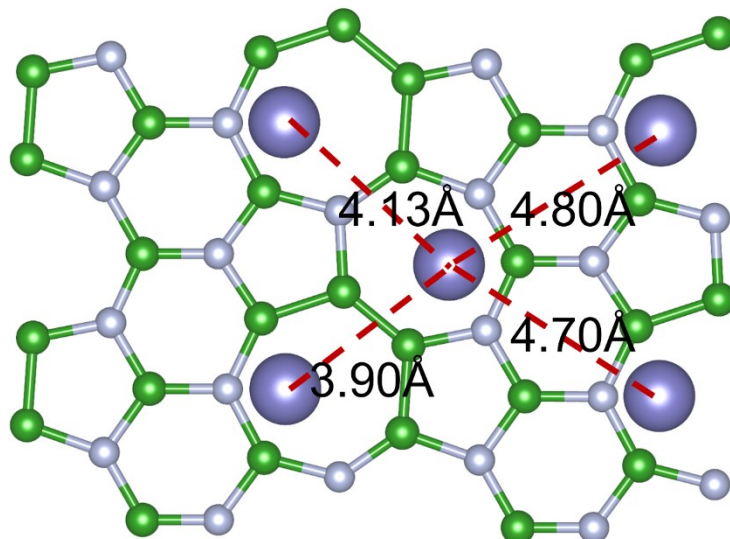

Fig. S6 The distances of the optimized first layer of K adsorption on B<sub>7</sub>N<sub>5</sub>.

The distance mismatch parameter was defined to investigate the adsorption performance of the B<sub>7</sub>N<sub>5</sub> substrate. As shown in Fig. S6, the average distance ( $d_1$ ) for first layer of K atoms adsorbed on B<sub>7</sub>N<sub>5</sub> is 4.38 Å, as well as Li (4.58 Å) and Na (4.42 Å). The equilibrium distance ( $d_2$ ) is 4.36 Å for K. Therefore, the distance mismatch ( $\Delta d$ ) can be calculated by the following equation:

$$\Delta d = |d_1 - d_2|/d_1 \quad (1)$$

The distance mismatches for different metal systems are 17.5% (Li), 10.0% (Na) and 0.5% (K).

**Fig. S7**

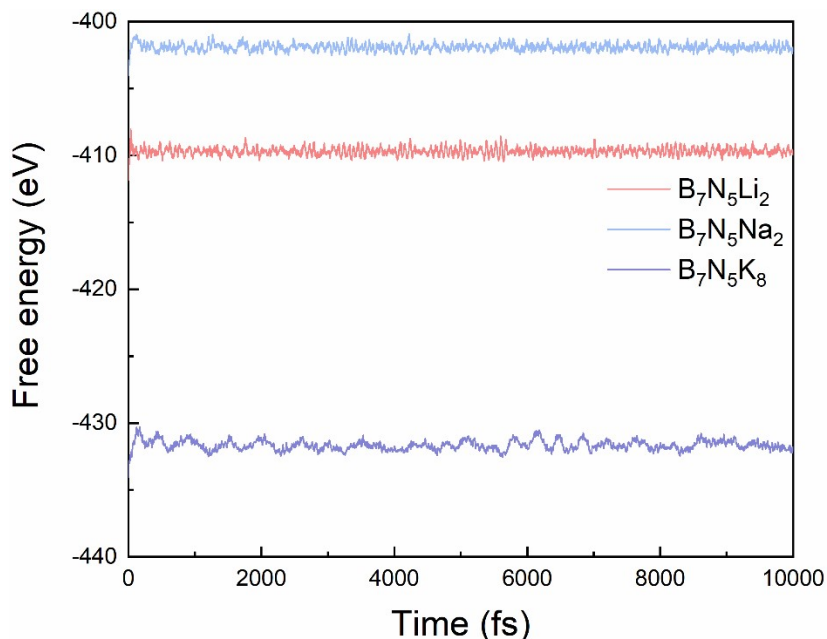

Fig. S7 The variation of the free energy in the AIMD simulations for  $B_7N_5Li_2$ ,  $B_7N_5Na_2$  and  $B_7N_5K_8$ .

The thermal stability of the  $B_7N_5$  monolayer after metal layer adsorption is essential for the safety of battery operation. Therefore, the AIMD simulations of the fully charged (Li, Na, K) systems are conducted to check the thermal dynamical stability of the end geometries ( $B_7N_5Li_2$ ,  $B_7N_5Na_2$ ,  $B_7N_5K_8$ ) at 300 K. As shown in Fig. S7, there is no sharp drop or rise for the free energy of three systems during the simulation, demonstrating the stability of all the end geometries. The thermal stability is also conveyed that the  $B_7N_5$  monolayer is an outstanding candidate electrode material for metal-ion batteries.



## Table S1

Table S1. The calculated elastic constant ( $C_{ij}$ ) values of  $B_7N_5$ .

| <b>Method</b> | <b><math>C_{11}</math></b> | <b><math>C_{12}</math></b> | <b><math>C_{16}</math></b> | <b><math>C_{22}</math></b> | <b><math>C_{26}</math></b> | <b><math>C_{66}</math></b> |
|---------------|----------------------------|----------------------------|----------------------------|----------------------------|----------------------------|----------------------------|
| Stress-strain | 231.64                     | 60.48                      | 0.58                       | 221.76                     | -0.88                      | 90.16                      |
| Energy-strain | 234.45                     | 61.80                      | 0.44                       | 224.50                     | -0.82                      | 91.13                      |

## Table S2

Table S2. The Young's modulus ( $Y$ ) and Poisson's ratio ( $\nu$ ) of  $B_7N_5$ .

| <b>Method</b> | <b><math>Y_{min}</math> (N/m)</b> | <b><math>Y_{max}</math> (N/m)</b> | <b><math>\nu_{min}</math></b> | <b><math>\nu_{max}</math></b> |
|---------------|-----------------------------------|-----------------------------------|-------------------------------|-------------------------------|
| Stress-strain | 205.85                            | 222.34                            | 0.23                          | 0.27                          |
| Energy-strain | 208.11                            | 224.84                            | 0.23                          | 0.28                          |

**Table S3**

Table S3. Theoretically calculated adsorption energy, distance between Li/Na/K and B<sub>7</sub>N<sub>5</sub>, charge transfer from Li/Na/K to B<sub>7</sub>N<sub>5</sub> at different adsorption hollow site.

| <b>Metal</b> | <b>Adsorption site</b> | <b>E<sub>ad</sub> (eV)</b> | <b>Distance (Å)</b> | <b>Q ( e )</b> |
|--------------|------------------------|----------------------------|---------------------|----------------|
| Li           | H1                     | -0.07                      | 1.85                | 0.781          |
|              | H2                     | -0.10                      | 1.84                | 0.761          |
|              | H3                     | 0.15                       | 1.73                | 0.772          |
|              | H4                     | 0.22                       | 1.74                | 0.807          |
|              | H5                     | -0.46                      | 1.51                | 0.786          |
|              | H6                     | -0.47                      | 1.50                | 0.759          |
| Na           | H1                     | -0.14                      | \                   | \              |
|              | H2                     | -0.18                      | \                   | \              |
|              | H3                     | 0.31                       | 2.21                | 0.796          |
|              | H4                     | 0.35                       | 2.22                | 0.811          |
|              | H5                     | -0.14                      | 2.08                | 0.737          |
|              | H6                     | -0.17                      | 2.10                | 0.692          |
| K            | H1                     | -0.69                      | \                   | \              |
|              | H2                     | -0.65                      | \                   | \              |
|              | H3                     | -0.40                      | 2.57                | 0.854          |
|              | H4                     | -0.37                      | 2.59                | 0.857          |
|              | H5                     | -0.69                      | 2.48                | 0.784          |
|              | H6                     | -0.65                      | 2.49                | 0.779          |

## Table S4

Table S4. Theoretically calculated diffusion coefficient on the surface of B<sub>7</sub>N<sub>5</sub> at 300 K.

| <b>Metal</b> | <b><i>l</i> (Å)</b> | <b>E<sub>a</sub> (eV)</b> | <b>Diffusion coefficient (cm<sup>2</sup>s<sup>-1</sup>)</b> |
|--------------|---------------------|---------------------------|-------------------------------------------------------------|
| Li           | 3.06                | 0.49                      | 5.96×10 <sup>-11</sup>                                      |
| Na           | 2.88                | 0.13                      | 5.23×10 <sup>-05</sup>                                      |
| K            | 2.83                | 0.10                      | 1.68×10 <sup>-04</sup>                                      |

**Table S5**

Table S5. The calculated adsorption energy, charge transfer and distance between metal atoms and B<sub>7</sub>N<sub>5</sub> for adsorption different Li, Na and K layers.

| Metal | Layer        | Adsorption sites   | Total numbers | E <sub>ads</sub> (eV) | Q <sub>ave</sub> ( e ) | Distance (Å)   |
|-------|--------------|--------------------|---------------|-----------------------|------------------------|----------------|
| Li    | One layer    | H6                 | 8             | -0.66                 | 0.72                   | 1.40           |
|       |              | H5+H6              | 16            | 0.23                  | \                      | 1.54           |
| Na    | One layer    | H6                 | 8             | -0.22                 | 0.56                   | 1.97           |
|       |              | H5+H6              | 16            | 0.07                  | \                      | 2.22           |
| K     | One layer    | H6                 | 8             | -0.48                 | 0.52                   | 2.45           |
|       |              | H5+H6              | 16            | -0.24                 | 0.29                   | 2.70           |
|       | Two layers   | H3+H5+H6           | 24            | -0.05                 | 0.21                   | 2.71/6.37      |
|       |              | H3+H4+H5+H6        | 32            | -0.14                 | 0.17                   | 2.68/6.53/7.15 |
|       | Three layers | H2+H3+<br>H4+H5+H6 | 40            | 0.37                  | \                      | 2.48/5.82/7.89 |

**Table S6**Table S6. The free energies of different B<sub>7</sub>N<sub>5</sub> structures after adsorbing Li/Na/K metal atoms.

| <b>Material</b>                                 | <b>Formation energy (eV)</b> | <b>Material</b>                               | <b>Formation energy (eV)</b> |
|-------------------------------------------------|------------------------------|-----------------------------------------------|------------------------------|
| B <sub>7</sub> N <sub>5</sub> Li <sub>0.5</sub> | -0.50                        | B <sub>7</sub> N <sub>5</sub> Li <sub>1</sub> | -0.50                        |
| B <sub>7</sub> N <sub>5</sub> Li <sub>1.5</sub> | -0.61                        | B <sub>7</sub> N <sub>5</sub> Li <sub>2</sub> | -0.65                        |
| B <sub>7</sub> N <sub>5</sub> Na <sub>0.5</sub> | -0.33                        | B <sub>7</sub> N <sub>5</sub> Na <sub>1</sub> | -0.26                        |
| B <sub>7</sub> N <sub>5</sub> Na <sub>1.5</sub> | -0.23                        | B <sub>7</sub> N <sub>5</sub> Na <sub>2</sub> | -0.21                        |
| B <sub>7</sub> N <sub>5</sub> K <sub>0.5</sub>  | -0.70                        | B <sub>7</sub> N <sub>5</sub> K <sub>1</sub>  | -0.57                        |
| B <sub>7</sub> N <sub>5</sub> K <sub>1.5</sub>  | -0.50                        | B <sub>7</sub> N <sub>5</sub> K <sub>2</sub>  | -0.48                        |
| B <sub>7</sub> N <sub>5</sub> K <sub>2.5</sub>  | -0.42                        | B <sub>7</sub> N <sub>5</sub> K <sub>3</sub>  | -0.41                        |
| B <sub>7</sub> N <sub>5</sub> K <sub>3.5</sub>  | -0.36                        | B <sub>7</sub> N <sub>5</sub> K <sub>4</sub>  | -0.36                        |
| B <sub>7</sub> N <sub>5</sub> K <sub>4.5</sub>  | -0.31                        | B <sub>7</sub> N <sub>5</sub> K <sub>5</sub>  | -0.27                        |
| B <sub>7</sub> N <sub>5</sub> K <sub>5.5</sub>  | -0.26                        | B <sub>7</sub> N <sub>5</sub> K <sub>6</sub>  | -0.25                        |
| B <sub>7</sub> N <sub>5</sub> K <sub>6.5</sub>  | -0.24                        | B <sub>7</sub> N <sub>5</sub> K <sub>7</sub>  | -0.22                        |
| B <sub>7</sub> N <sub>5</sub> K <sub>7.5</sub>  | -0.24                        | B <sub>7</sub> N <sub>5</sub> K <sub>8</sub>  | -0.22                        |

**Table S7**

Table S7. The lattice constant and change in lattice constant (%) after adsorption different metal on B<sub>7</sub>N<sub>5</sub>.

| <b>System</b>                                 | <b><i>a</i> (Å)</b> | <b><i>b</i> (Å)</b> | <b>Change in <i>a</i> (%)</b> | <b>Change in <i>b</i> (%)</b> |
|-----------------------------------------------|---------------------|---------------------|-------------------------------|-------------------------------|
| B <sub>7</sub> N <sub>5</sub> Li <sub>2</sub> | 10.10               | 14.27               | 0.40                          | 0.35                          |
| B <sub>7</sub> N <sub>5</sub> Na <sub>2</sub> | 10.11               | 14.29               | 0.49                          | 0.49                          |
| B <sub>7</sub> N <sub>5</sub> K <sub>2</sub>  | 10.10               | 14.26               | 0.40                          | 0.28                          |
| B <sub>7</sub> N <sub>5</sub> K <sub>4</sub>  | 10.09               | 14.30               | 0.30                          | 0.56                          |
| B <sub>7</sub> N <sub>5</sub> K <sub>6</sub>  | 10.10               | 14.30               | 0.40                          | 0.63                          |
| B <sub>7</sub> N <sub>5</sub> K <sub>8</sub>  | 10.14               | 14.41               | 0.79                          | 1.32                          |

**Table S8**

Table S8. Comparison of diffusion energy barriers, capacity and open circuit voltage (OCV) for various K-ion batteries.

| <b>Materials</b>                              | <b>Diffusion barriers (eV)</b> | <b>Capacity (mAh/g)</b> | <b>OCV (V)</b> |
|-----------------------------------------------|--------------------------------|-------------------------|----------------|
| B <sub>7</sub> N <sub>5</sub> (this work)     | 0.10                           | 1471.5                  | 0.14           |
| BP <sup>1</sup>                               | 0.16                           | 570                     | 0.28           |
| 1H-BeP <sub>2</sub> <sup>2</sup>              | 0.13                           | 377.5                   | 0.34           |
| Graphit <sup>3</sup>                          | 0.26                           | 273                     | -              |
| Si <sub>3</sub> C <sup>4</sup>                | 0.18                           | 836                     | 0.5            |
| VS <sub>2</sub> <sup>5</sup>                  | 0.06                           | 466                     | -              |
| Ti <sub>3</sub> C <sub>2</sub> <sup>6</sup>   | 0.10                           | 191.8                   | 0.12           |
| TiS <sub>2</sub> <sup>7</sup>                 | 0.09                           | 957                     | 1.0            |
| TiF <sub>2</sub> <sup>8</sup>                 | 0.25                           | 208                     | 0.64           |
| Ti <sub>2</sub> BN <sub>2</sub> <sup>9</sup>  | 0.37                           | 398                     | 0.16           |
| Ti <sub>2</sub> PS <sub>2</sub> <sup>10</sup> | 0.07                           | 281                     | 0.28           |
| Nb <sub>2</sub> N <sup>11</sup>               | 0.02                           | 201                     | 0.5            |
| SnSe <sub>2</sub> <sup>12</sup>               | 0.11                           | 387                     | 0.48           |
| SnC <sup>13</sup>                             | 0.17                           | 410                     | 0.41           |
| MoS <sub>2</sub> <sup>14</sup>                | 0.06                           | 334                     | 0.24           |
| β-Sb <sup>15</sup>                            | 0.09                           | 440.2                   | 0.09           |
| BeNC <sub>16</sub> <sup>16</sup>              | 0.5                            | 747.3                   | 0.48           |



**Table S9**Table S9 The structural information of the B<sub>7</sub>N<sub>5</sub> monolayer

| Compound                                                                                                         | Atomic position |        |        |     |
|------------------------------------------------------------------------------------------------------------------|-----------------|--------|--------|-----|
| B <sub>7</sub> N <sub>5</sub><br>a = 5.03 Å<br>b = 7.11 Å<br>c = 20.00 Å<br>α = 90.0°<br>β = 90.0°<br>γ = 88.83° | B               | 0.5130 | 0.6481 | 0.5 |
|                                                                                                                  | B               | 0.9037 | 0.1317 | 0.5 |
|                                                                                                                  | B               | 0.2663 | 0.3444 | 0.5 |
|                                                                                                                  | B               | 0.0235 | 0.6697 | 0.5 |
|                                                                                                                  | B               | 0.3587 | 0.9678 | 0.5 |
|                                                                                                                  | B               | 0.6977 | 0.9511 | 0.5 |
|                                                                                                                  | B               | 0.7886 | 0.3564 | 0.5 |
|                                                                                                                  | N               | 0.7602 | 0.7546 | 0.5 |
|                                                                                                                  | N               | 0.5213 | 0.4417 | 0.5 |
|                                                                                                                  | N               | 0.0286 | 0.4664 | 0.5 |
|                                                                                                                  | N               | 0.2717 | 0.7691 | 0.5 |
| N                                                                                                                | 0.1928          | 0.1387 | 0.5    |     |

## Table S10

Table S10 The value of the high symmetry points used to plot the band structures of the B<sub>7</sub>N<sub>5</sub> monolayer

| High symmetry point | Value |      |      |
|---------------------|-------|------|------|
| G                   | 0.00  | 0.00 | 0.00 |
| X                   | 0.50  | 0.00 | 0.00 |
| H_1                 | 0.98  | 0.49 | 0.00 |
| C                   | 0.50  | 0.50 | 0.00 |
| H                   | 0.02  | 0.51 | 0.00 |
| Y                   | 0.00  | 0.50 | 0.00 |

## REFERENCES

1. H. R. Jiang, W. Shyy, M. Liu, L. Wei, M. C. Wu and T. S. Zhao, *J. Mater. Chem. A*, 2017, **5**, 672-679.
2. Q.-H. Qiu, S.-Y. Wu, G.-J. Zhang, L. Yan and Z.-T. Wei, *Comput. Mater. Sci.*, 2023, **216**, 111868.
3. Z. Xu, X. Lv, J. Chen, L. Jiang, Y. Lai and J. Li, *Carbon*, 2016, **107**, 885-894.
4. Y. Wang and Y. Li, *J. Mater. Chem. A*, 2020, **8**, 4274-4282.
5. D. Wang, Y. Liu, X. Meng, Y. Wei, Y. Zhao, Q. Pang and G. Chen, *J. Mater. Chem. A*, 2017, **5**, 21370-21377.
6. D. Er, J. Li, M. Naguib, Y. Gogotsi and V. B. Shenoy, *ACS Appl Mater Interfaces*, 2014, **6**, 11173-11179.
7. A. Samad, A. Shafique and Y. H. Shin, *Nanotechnology*, 2017, **28**, 175401.
8. M. Zhou, Y. Shen, J. Liu, L. Lv, Y. Zhang, X. Meng, X. Yang, Y. Zheng and Z. Zhou, *Vacuum*, 2023, **210**, 111822.
9. B. Liang, N. Ma, Y. Wang, T. Wang and J. Fan, *Appl. Surf. Sci.*, 2022, **599**, 153927.
10. B. Ge, B. Chen and L. Li, *Appl. Surf. Sci.*, 2021, **550**, 149177.
11. Y. Wang, W. Tian, H. Zhang and Y. Wang, *Phys. Chem. Chem. Phys.*, 2021, **23**, 12288-12295.
12. J. Rehman, X. F. Fan, M. K. Butt, A. Laref, V. A. Dinh and W. T. Zheng, *Appl. Surf. Sci.*, 2021, **566**, 150522.
13. J. Rehman, X. Fan, A. Laref and W. T. Zheng, *ChemElectroChem*, 2020, **7**, 3832-3838.
14. J. Rehman, X. Fan, A. Laref, V. A. Dinh and W. T. Zheng, *J. Alloys Compd.*, 2021, **865**, 158782.
15. G. A. Shaikh, D. Cornil, S. K. Gupta, R. Ahuja and P. N. Gajjar, *Energy & Fuels*, 2022, **36**, 7087-7095.
16. S. Ullah, P. A. Denis and F. Sato, *Int J Quantum Chem*, 2019, **119**, e25900.
